# Supplementary material for: Mn-doping method boosts Se doping concentration in Cu2S towards high thermoelectric performance
Source: Royal Society of Chemistry journal article supplement (doi:10.1039/d4tc03056g), 2024-10-19
Supplement: d4tc03056g1.pdf [file d4tc03056g1.pdf]

## Supporting Information

### **Mn-doping method boosts Se doping concentration in Cu<sub>2</sub>S towards high thermoelectric performance**

*Chen Gong, Zhiwei Zeng, Xiaoling Sun, Chengran Luo, Hongyi Chen\**

C Gong, Z Zeng, X Sun, C Luo, H Chen\*

Central South University

College of Chemistry and Chemical Engineering

Central South University

Changsha 410083, China

E- mail: [hongyichen@csu.edu.cn](mailto:hongyichen@csu.edu.cn)

## Supplementary Index

### S1. Single parabolic band (SPB) model

### S2. Calculation of estimated optical band gap

**Fig. S1.** SEM images and the EDS mapping for Cu, S, Mn and Se for  $\text{Cu}_2\text{S}_{1-x}\text{Se}_x$  (a)  $x = 0.015$ , (b)  $x = 0.025$ , (c)  $x = 0.05$ , (d)  $x = 0.1$ .

**Fig. S2.** (a) The elemental EDS mapping of  $\text{Cu}_{1.96}\text{Mn}_{0.02}\text{S}_{0.975}\text{Se}_{0.025}$ . (b) The fast Fourier transform (FFT) patterns for ②, ③, ④ regions in high-magnification TEM image of  $\text{Cu}_{1.96}\text{Mn}_{0.02}\text{S}_{0.975}\text{Se}_{0.025}$ .

**Fig. S3.** (a) Comprehensive XPS scanning of  $\text{Cu}_{1.96}\text{Mn}_{0.02}\text{S}_{0.975}\text{Se}_{0.025}$  sample. (b) The core states of Cu  $2p_{1/2}$  and  $2p_{3/2}$ . (c) S  $2p_{1/2}$  and S  $2p_{3/2}$  cores. (d) The core states of Mn  $2p_{1/2}$  and  $2p_{3/2}$ . (e) The core states of Mn 3s. The energy value of the 3s splitting peak of  $\text{Mn}^{2+}$  is 6eV. (f) Se  $3d_{3/2}$  and Se  $3d_{5/2}$  cores.

**Fig. S4.** The calculated electronic band structures for the  $\text{Cu}_2\text{S}$  and  $\text{Cu}_{1.96}\text{Mn}_{0.02}\text{S}_{0.925}\text{Se}_{0.075}$ .

**Fig. S5.** Schematic atomic orbital hybridization diagram of Se doping in  $\text{Cu}_2\text{S}$ .

**Fig. S6.** The pDOS of (a)  $\text{Cu}_2\text{S}$ . (b)  $\text{Cu}_2\text{S}_{0.925}\text{Se}_{0.075}$ . (c)  $\text{Cu}_{1.96}\text{Mn}_{0.02}\text{S}_{0.925}\text{Se}_{0.075}$ .

**Fig. S7.** The curvature of the fitting the electronic band structures for the  $\text{Cu}_2\text{S}$  and  $\text{Cu}_2\text{S}_{0.925}\text{Se}_{0.075}$  in (a) G - M(1 0 0), (b) G - K(1 1 0) and (c) G - A(0 0 1). Effective mass for the  $\text{Cu}_2\text{S}$  and  $\text{Cu}_2\text{S}_{0.925}\text{Se}_{0.075}$  in G - M(1 0 0), G - K(1 1 0), G - A(0 0 1).

**Fig. S8.** Temperature dependence of (a) Lorentz constant, (b) Electronic thermal conductivity ( $\kappa_e$ ).

**Fig. S9.** (a) The Vickers hardness comparison of popular thermoelectric materials. (b) The compression stress curve of  $\text{Cu}_{1.96}\text{Mn}_{0.02}\text{S}_{0.95}\text{Se}_{0.05}$ .

**Fig. S10.** Heating and cooling cycle test of  $\text{Cu}_{1.96}\text{Mn}_{0.02}\text{S}_{0.95}\text{Se}_{0.05}$ . (a) Electrical conductivity  $\sigma$ . (b) Seebeck coefficient  $\alpha$ . (c) thermal conductivity  $\kappa$ .

**Fig. S11.** Comparison of  $zT$  for  $\text{Cu}_{1.96}\text{Mn}_{0.02}\text{S}_{0.95}\text{Se}_{0.05}$  with other class of high performing typical copper based TE materials containing multiple dopants.

## Supplementary Text

### S1. Single parabolic band (SPB) model.

$$L = \left(\frac{k_B}{e}\right)^2 \times \left\{ \frac{(3 + \lambda_\tau)F_{2+\lambda_\tau}(\eta)}{(1 + \lambda_\tau)F_{\lambda_\tau}(\eta)} - \left[ \frac{(2 + \lambda_\tau)F_{1+\lambda_\tau}(\eta)}{(1 + \lambda_\tau)F_{\lambda_\tau}(\eta)} \right]^2 \right\} \quad (1)$$

$$\alpha = \frac{k_B}{e} \left[ \frac{(2 + \lambda_\tau)F_{1+\lambda_\tau}(\eta)}{(1 + \lambda_\tau)F_{\lambda_\tau}(\eta)} - \eta \right] \quad (2)$$

$$n = \frac{4\pi(2m^*k_B T)^{3/2}}{h^2} F_{1/2}(\eta) \quad (3)$$

$$F_i(\eta) = \int_0^\infty \frac{\xi^i}{1 + \exp(\xi - \eta)} d\xi \quad (4)$$

In the above equations, (4) is the Fermi integral,  $\eta = E_F/K_B T$  is the reduction Fermi energy,  $\xi$  is the reduction carrier energy,  $K_b$  is Boltzmann's constant,  $e$  is the electron charge,  $h$  is Planck's constant,  $m^*$  is the effective mass,  $\lambda_\tau$  is the scattering factor and its value is 0.  $L$  is the Lorentz constant.

### S2. Calculation of estimated optical band gap

$$(\varepsilon h\nu)^{1/m} = B(h\nu - E_g) \quad (5)$$

where  $\varepsilon$  is the absorption coefficient,  $h$  is Planck constant,  $\nu$  is the incident photon frequency,  $B$  is the proportionality constant, and  $E_g$  is the band gap.  $m$  is related to the properties of semiconductor materials,  $m=2$  was used for Tauc plot analysis. Based on Lambert-Beer's law:

$$A = K\varepsilon \quad (6)$$

where  $A$  is the absorbance of the sample and  $K$  is a proportionality constant independent of absorbance. Putting the Lambert-Beer formula into equation (5), we can get formula :

$$(Ah\nu)^{1/m} = BK^{1/m}(h\nu - E_g) \quad (7)$$

Let  $BK^{1/m}$  be a constant  $C$ ,  $A$  be a  $F(R)$ , which is:

$$(F(R)h\nu)^{1/m} = C(h\nu - E_g) \quad (8)$$

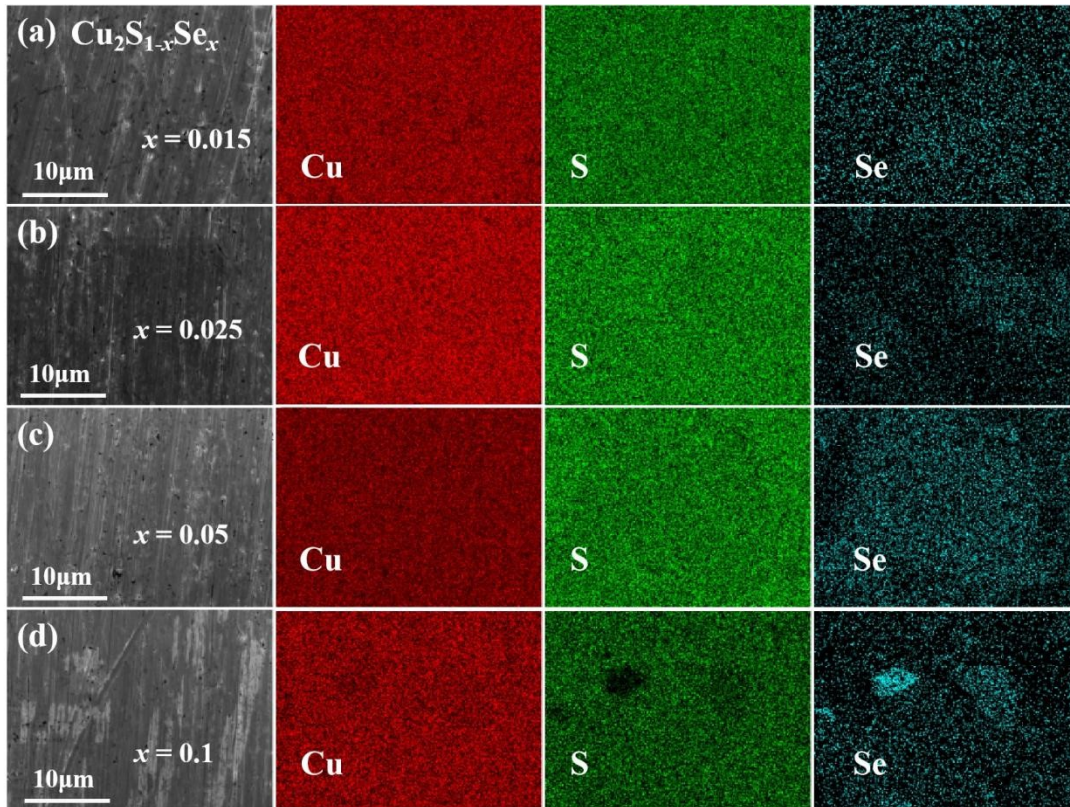

**Fig. S1.** SEM images and the EDS mapping for Cu, S, Mn and Se for  $\text{Cu}_2\text{S}_{1-x}\text{Se}_x$  (a)  $x = 0.015$ , (b)  $x = 0.025$ , (c)  $x = 0.05$ , (d)  $x = 0.1$ .

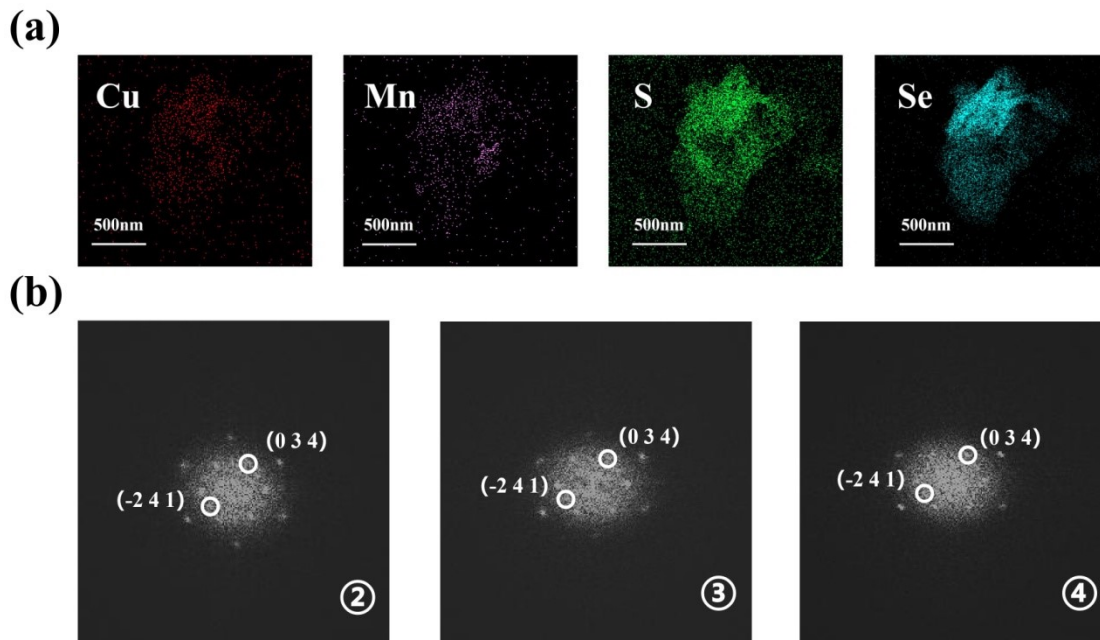

**Fig. S2.** Microstructure for  $\text{Cu}_{1.96}\text{Mn}_{0.02}\text{S}_{0.975}\text{Se}_{0.025}$ . (a) The elemental EDS mapping of  $\text{Cu}_{1.96}\text{Mn}_{0.02}\text{S}_{0.975}\text{Se}_{0.025}$ . (b) The fast Fourier transform (FFT) patterns for 2, 3, 4 regions in high-magnification TEM image of  $\text{Cu}_{1.96}\text{Mn}_{0.02}\text{S}_{0.975}\text{Se}_{0.025}$ .

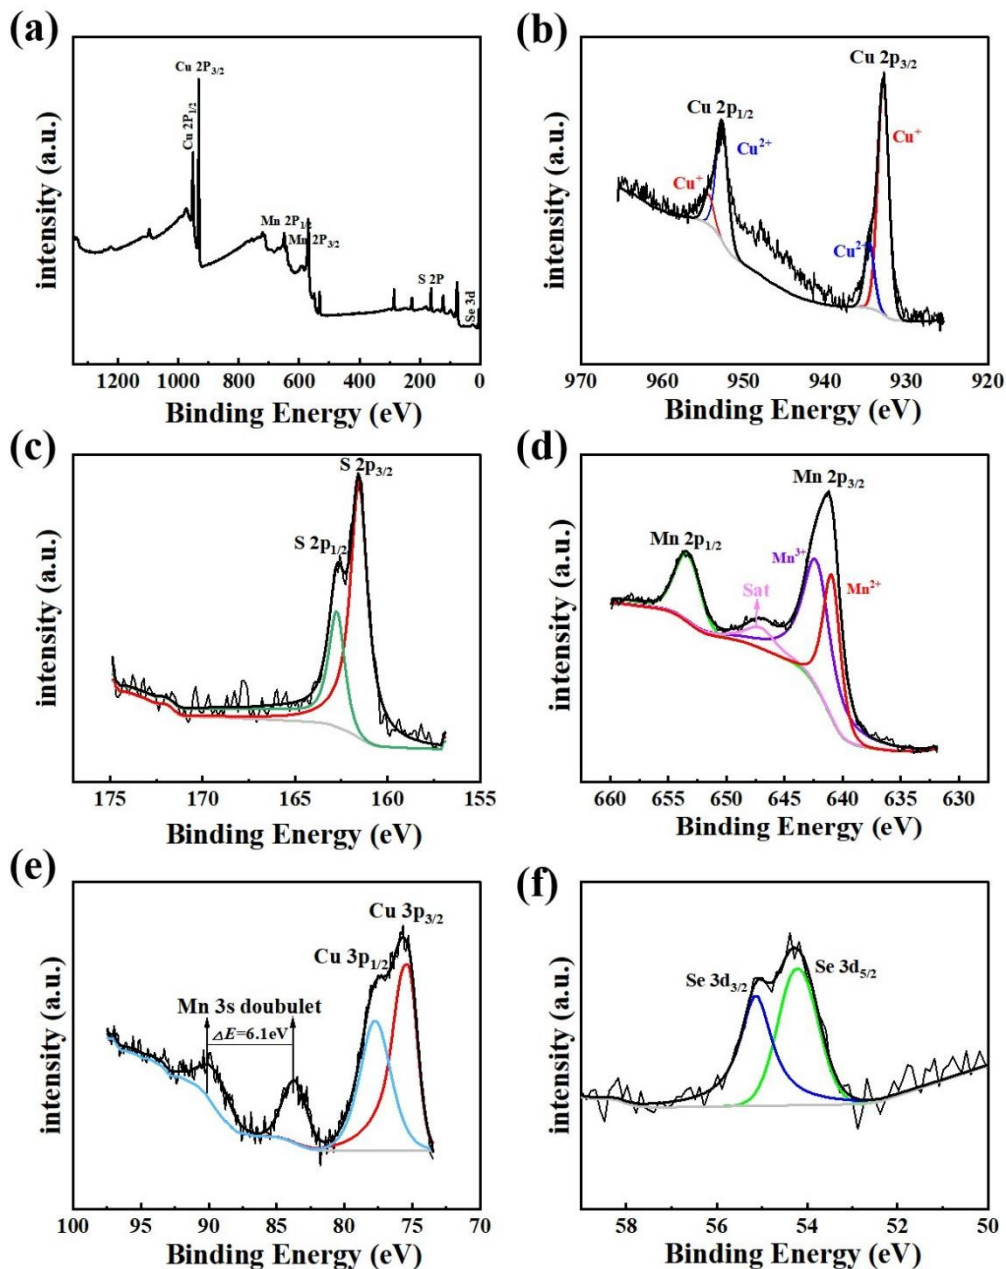

**Fig. S3.** The X-ray photoelectron spectroscopy (XPS) for  $\text{Cu}_{1.96}\text{Mn}_{0.02}\text{S}_{0.975}\text{Se}_{0.025}$ . (a) Comprehensive XPS scanning of  $\text{Cu}_{1.96}\text{Mn}_{0.02}\text{S}_{0.975}\text{Se}_{0.025}$  sample. (b) The core states of Cu  $2p_{1/2}$  and  $2p_{3/2}$ . (c) S  $2p_{1/2}$  and S  $2p_{3/2}$  cores. (d) The core states of Mn  $2p_{1/2}$  and  $2p_{3/2}$ . (e) The core states of Mn 3s. The energy value of the 3s splitting peak of  $\text{Mn}^{2+}$  is 6 eV. (f) Se  $3d_{3/2}$  and Se  $3d_{5/2}$  cores.

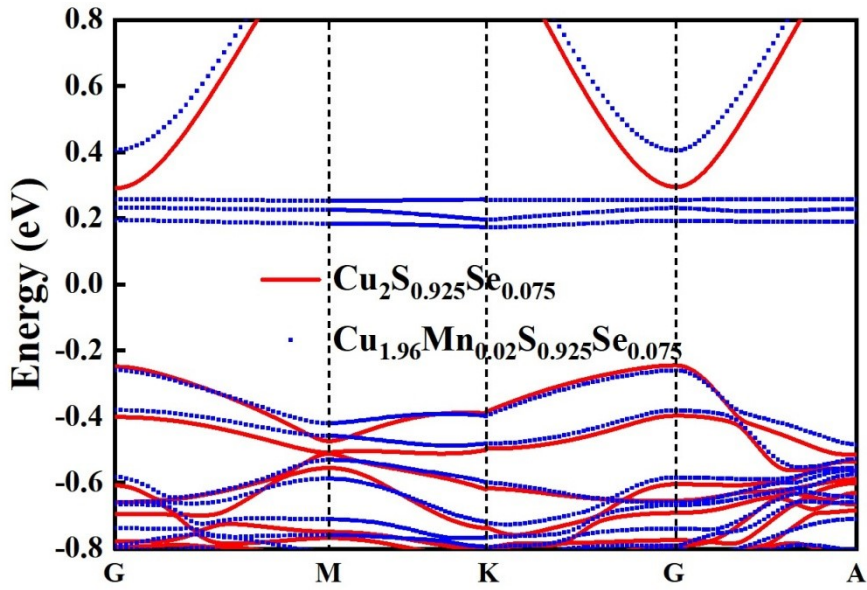

Fig. S4. The calculated electronic band structures for the  $\text{Cu}_2\text{S}_{0.925}\text{Se}_{0.075}$  and  $\text{Cu}_{1.96}\text{Mn}_{0.02}\text{S}_{0.925}\text{Se}_{0.075}$ .

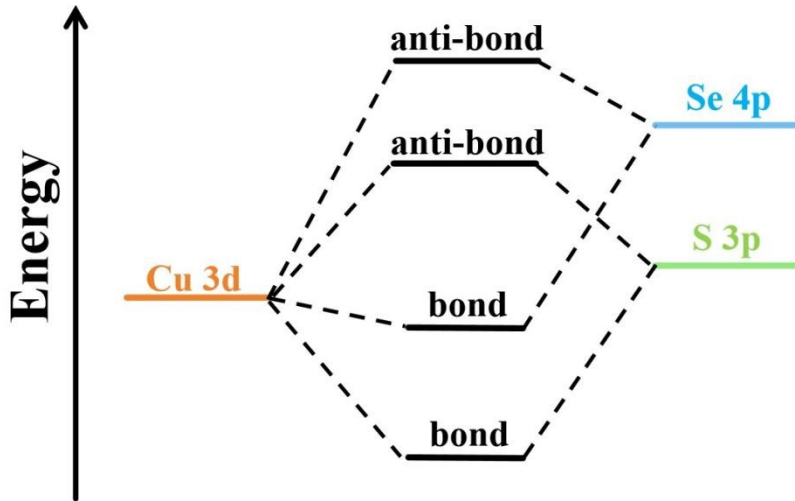

Fig. S5. Schematic atomic orbital hybridization diagram of Se doping in  $\text{Cu}_2\text{S}$ .

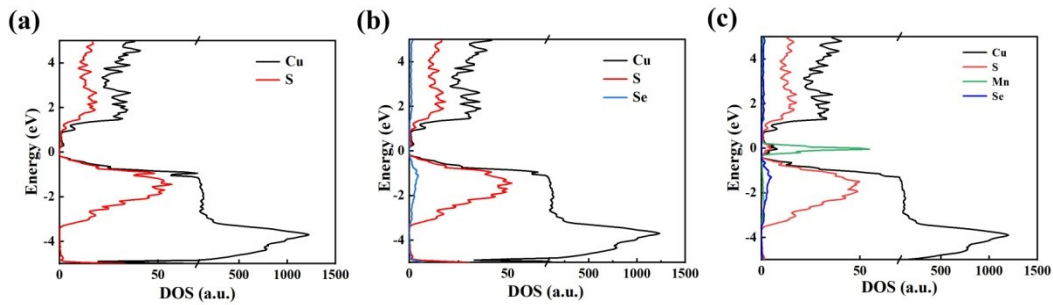

Fig. S6. The pDOS of (a)  $\text{Cu}_2\text{S}$ , (b)  $\text{Cu}_2\text{S}_{0.925}\text{Se}_{0.075}$ , (c)  $\text{Cu}_{1.96}\text{Mn}_{0.02}\text{S}_{0.925}\text{Se}_{0.075}$ .



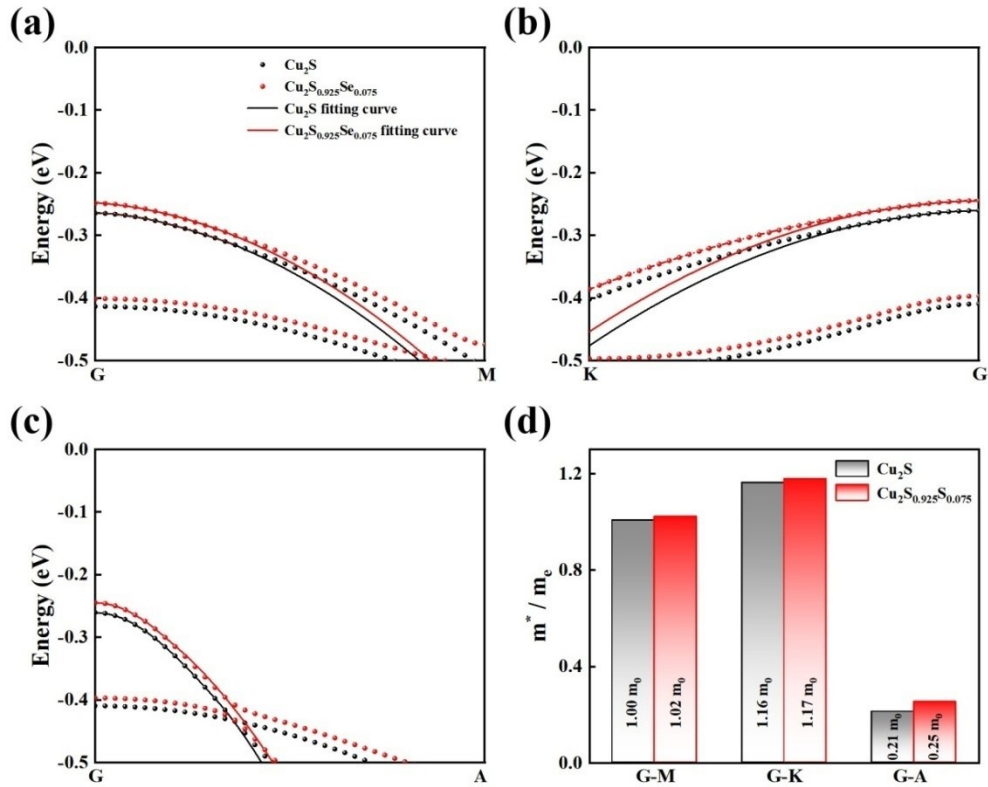

**Fig. S7.** The curvature of the fitting the electronic band structures for the Cu<sub>2</sub>S and Cu<sub>2</sub>S<sub>0.925</sub>Se<sub>0.075</sub> in (a) G - M(1 0 0), (b) G - K(1 1 0) and (c) G - A(0 0 1). Effective mass for the Cu<sub>2</sub>S and Cu<sub>2</sub>S<sub>0.925</sub>Se<sub>0.075</sub> in G - M(1 0 0), G - K(1 1 0), G - A(0 0 1).

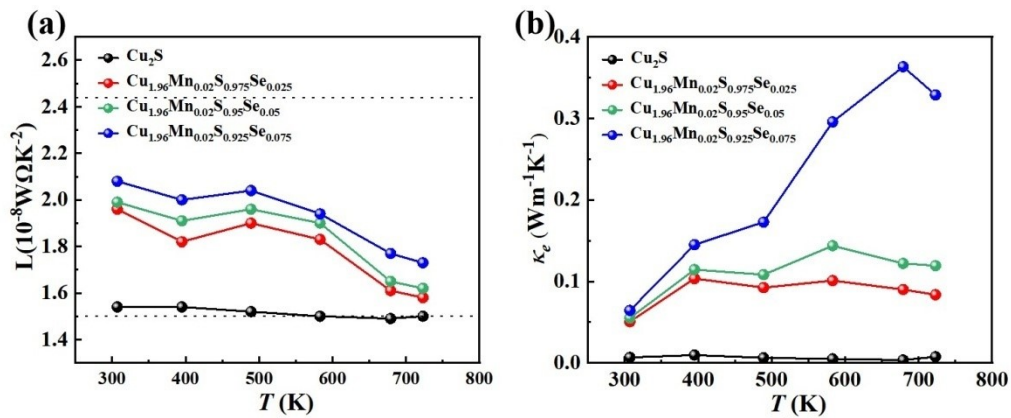

**Fig. S8.** Temperature dependence of (a) Lorentz constant, and (b) Electronic thermal conductivity ( $\kappa_e$ ).

The Vickers hardness and compressive stress of the  $\text{Cu}_{1.96}\text{Mn}_{0.02}\text{S}_{0.95}\text{Se}_{0.05}$  were tested as shown in Fig. S8. The Vickers hardness of our material is 59.3 Hv, which is at a medium level compared to other thermoelectric materials. When the compressive stress reaches about 96 Mpa, the compression limit of the sample is 35%, and more pressure is applied, the sample is completely shattered. The Vickers hardness test and compressive stress test showed good mechanical properties of the sample.

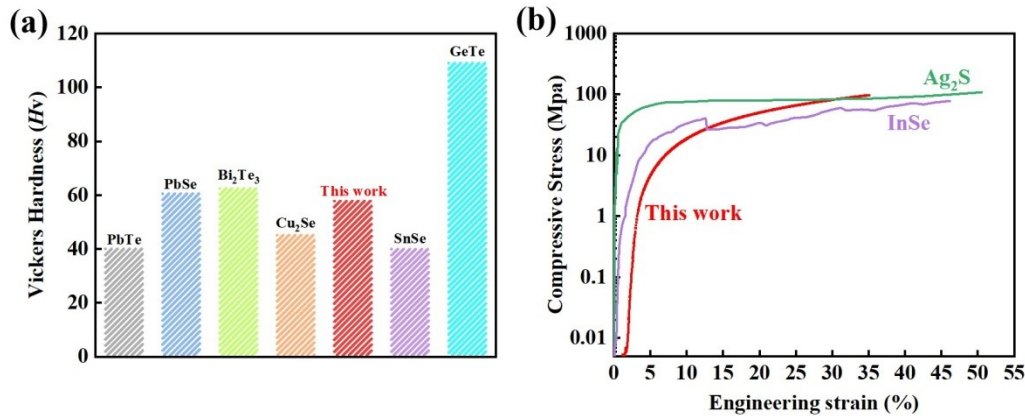

**Fig. S9.** (a) The Vickers hardness comparison of popular thermoelectric materials. (b) The compression stress curve of  $\text{Cu}_{1.96}\text{Mn}_{0.02}\text{S}_{0.95}\text{Se}_{0.05}$  and other typical TE materials.

The cyclic test on the best performance sample  $\text{Cu}_{1.96}\text{Mn}_{0.02}\text{S}_{0.95}\text{Se}_{0.05}$  are carried out. Based on the results of the tests, our materials have good heating and cooling cycle performance.

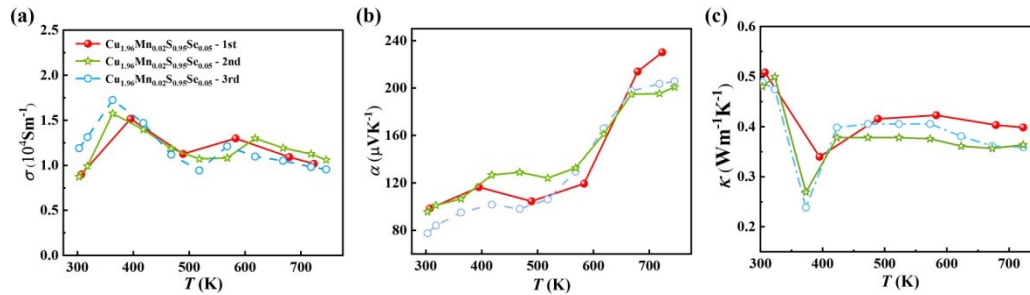

**Fig. S10.** Heating and cooling cycle test of  $\text{Cu}_{1.96}\text{Mn}_{0.02}\text{S}_{0.95}\text{Se}_{0.05}$ . (a) Electrical conductivity  $\sigma$ . (b) Seebeck coefficient  $\alpha$ . (c) thermal conductivity  $\kappa$ .



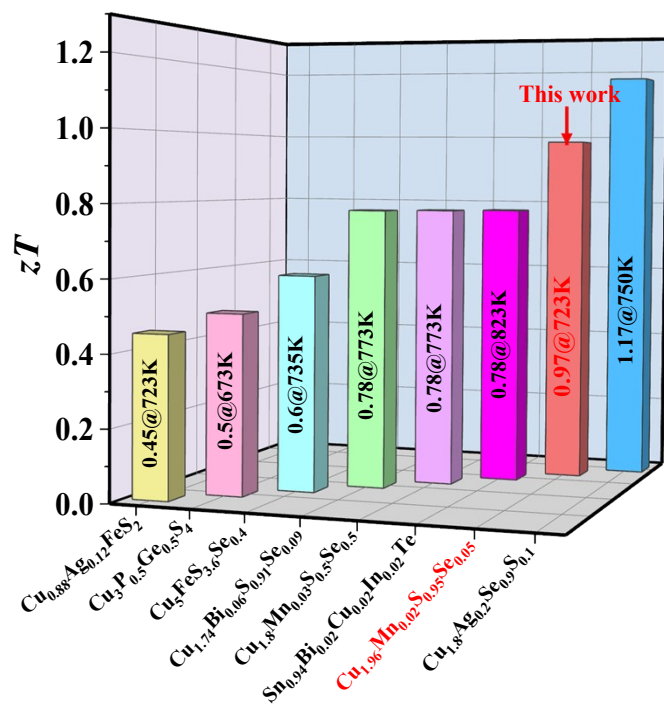

**Fig. S11.** Comparison of  $zT$  for  $\text{Cu}_{1.96}\text{Mn}_{0.02}\text{S}_{0.95}\text{Se}_{0.05}$  with other class of high performing typical copper based TE materials containing multiple dopants.
